# Supplementary material for: Grape Seed Proanthocyanidins Mitigate the Disturbances Caused by an Abrupt Photoperiod Change in Healthy and Obese Rats
Source: MDPI journal article supplement (doi:10.3390/nu14091834), 2022-04-27
Supplement: s1 [file s1]

Table S1. Statistical summary.

| Parameter                                          | 2-way ANOVA for L18 conditons | 2-way ANOVA for L6 conditons | 3-way ANOVA |
|----------------------------------------------------|-------------------------------|------------------------------|-------------|
| Body weight gain in 7th week                       | DxT                           | n.s.                         | TxD         |
| Energy intake in 7th week                          | D                             | D                            | D           |
| AUC Energy Expenditure light phase                 | T                             | n.s.                         | T, P        |
| AUC Energy Expenditure dark phase                  | n.s.                          | D                            | T, D        |
| AUC Energy from carbohydrate Oxidation light phase | D                             | n.s.                         | D           |
| AUC Energy from carbohydrate Oxidation dark phase  | D                             | D                            | D           |
| AUC Energy from fat Oxidation light phase          | D                             | n.s.                         | D           |
| AUC Energy from fat Oxidation dark phase           | D                             | D                            | D           |
| AUC Vertical activity light phase                  | D                             | D                            | P, D, TxP   |
| AUC Vertical activity dark phase                   | D                             | D                            | D, P        |
| Melatonin light phase                              | D                             | D                            | D           |
| Melatonin dark phase                               | n.s.                          | n.s.                         | P           |
| Corticosterone light phase                         | T                             | n.s.                         | T           |
| Corticosterone dark phase                          | n.s.                          | n.s.                         | P           |
| Testosterone light phase                           | D                             | n.s.                         | P           |
| Testosterone dark phase                            | TxD                           | D                            | D, P, TxD   |
| T3/T4 light phase                                  | n.s.                          | n.s.                         | n.s.        |
| T3/T4 dark phase                                   | n.s.                          | D                            | D           |

D, diet effect; T, GSPE treatment effect; P, photoperiod effect; TxD, interaction between treatment and Diet; TxP, interaction between GSPE treatment and Photoperiod.
